# Supplementary material for: Exploring Effects of C. elegans Protective Natural Microbiota on Host Physiology
Source: PubMed Central journal article supplement (PMC8884406; doi:10.3389/fcimb.2022.775728), 2022-02-14
Supplement: DataSheet_1.pdf [file DataSheet_1.pdf]

## Supplementary Figures

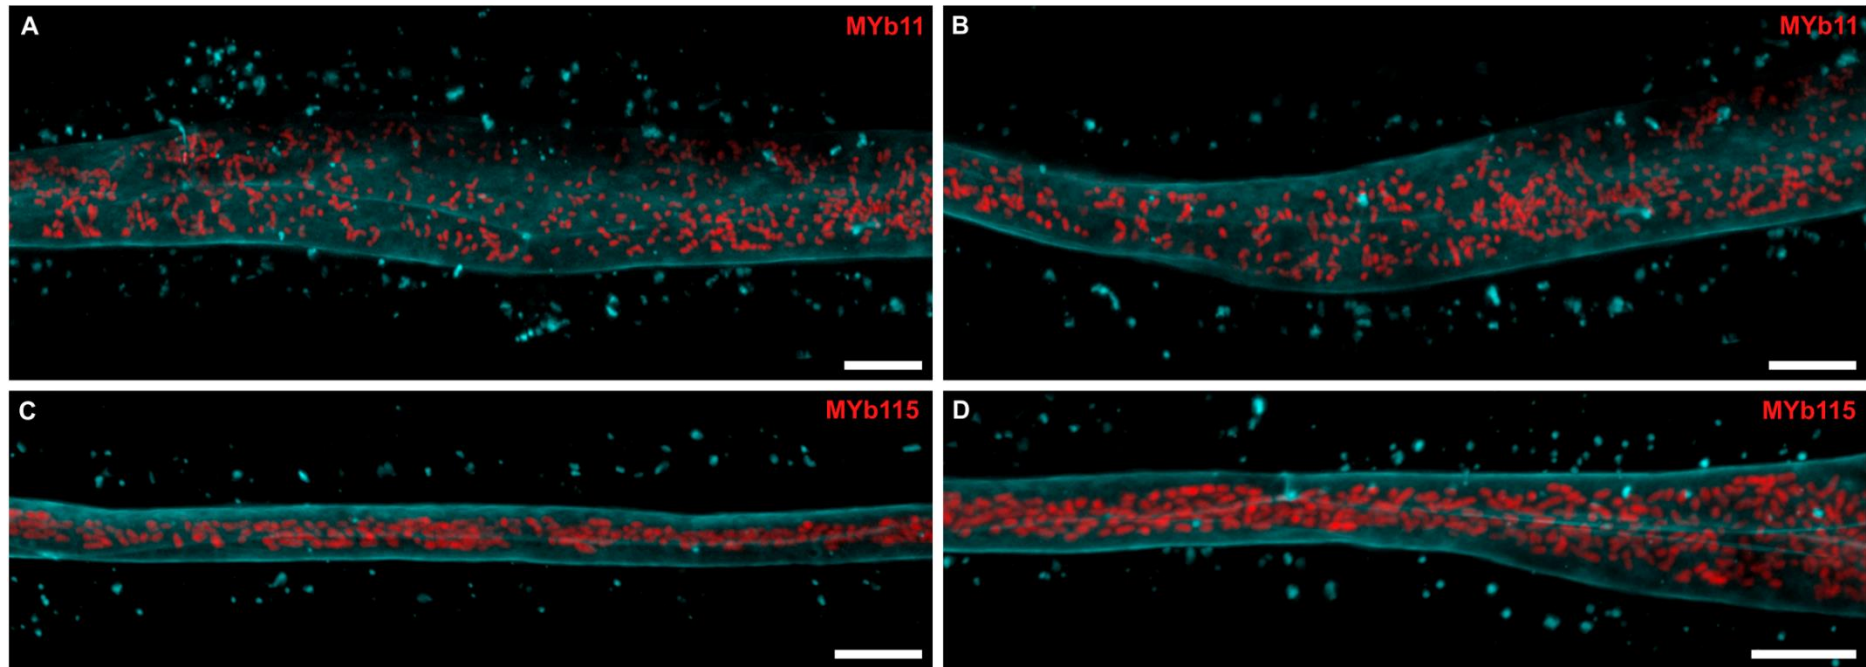

**Supplementary Figure S1 Colonization of the *C. elegans* intestine by MYb11 and MYb115.** Confocal laser scanning micrographs (maximum intensity projections) showing intestinal structures of young adult worms that had been exposed to (A, B) *P. lurida* MYb11 or (C, D) *P. fluorescens* MYb115. The dTomato fluorescence of the bacteria is shown in red, and the CFP fluorescence of the intestinal structures is shown in cyan. The intestinal structures were either (A, C) in the central or (B, D) in the posterior intestine. Scale bars = 10  $\mu$ m.

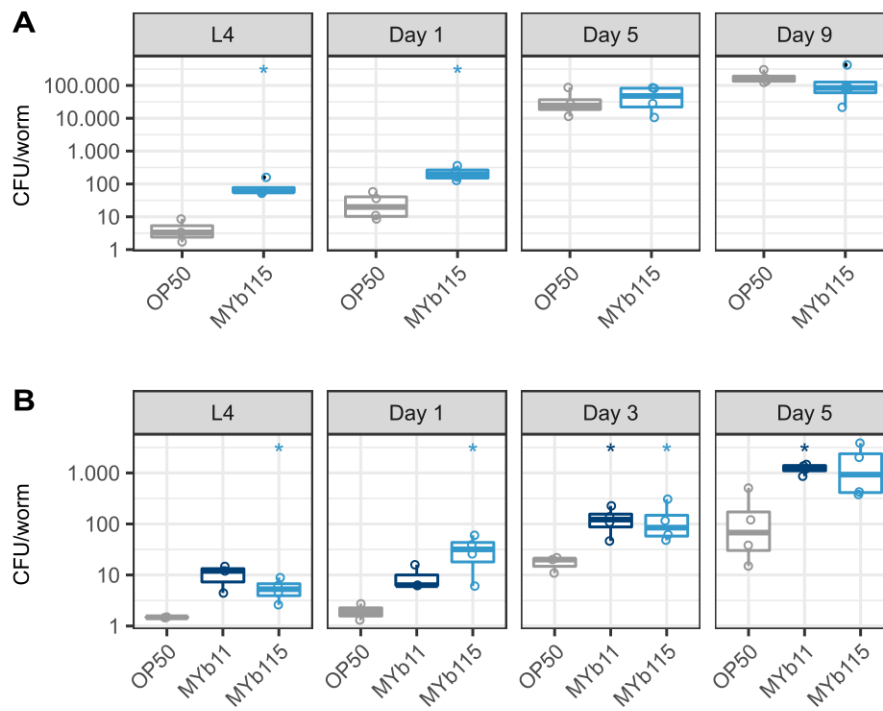

**Supplementary Figure S2 Bacterial colonization of *C. elegans* at the L4 stage and different days of adult lifespan grown on MYb11, MYb115, and OP50.** Bacterial load was measured at the given time points as colony-forming units (CFUs) per worm. *P* values are considered significant and denoted with asterisks according to  $*p < 0.05$ , as determined by GLM analysis with Tukey multiple comparison test and FDR correction. Shown are two independent experimental runs (n = 4 technical replicates).

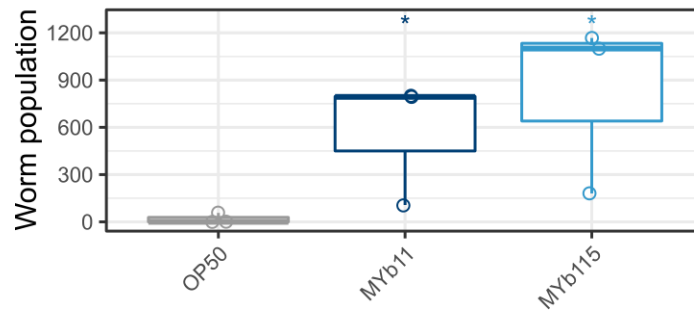

**Supplementary Figure S3 MYb11 and MYb115 increase *C. elegans* fitness in the presence of the pathogenic *B. thuringiensis* strain Bt679.** The population size of the worms was measured in the presence of pathogenic *B. thuringiensis* Bt679 on each of the protective microbiota isolates *P. lurida* MYb11 and *P. fluorescence* MYb115 and the control food bacterium *E. coli* OP50. Three L4 larvae were picked into the infection plates with lawns containing each treatment bacteria adjusted to an OD<sub>600nm</sub> of 10 mixed with the Bt679 spores. Worm population size was measured after an incubation period of 5 days at 20°C (n = 3 independent runs). Statistical analysis was performed compared to the OP50 worms, using the Wilcoxon-Rank Sum Test followed by FDR correction for multiple testing (**Supplementary file**). *P* values are considered significant and denoted with asterisks according to \*  $p < 0.05$
